# Supplementary material
Source: Elsevier journal article supplement (https://discovery-pp.ucl.ac.uk/1433395/5/mmc4.pdf)
Supplement: mmc4 [file mmc4.pdf]

**Table S2.** Secondary reward paradigm. Psychophysiological Interaction (PPI). Regions showing functional connectivity with vmPFC.

| <b>Region</b>                  | <b>Voxels</b> | <b>t-value</b> | <b>MNI (x y z)</b> |
|--------------------------------|---------------|----------------|--------------------|
| Right posterior insula         | 89            | 3.01           | 44 -14 12          |
| Left posterior insula          | 29            | 2.94           | -40 -10 10         |
| Left precentral gyrus          | 121           | 3.11           | -56 -2 8           |
| Right cingulate gyrus          | 19            | 3.21           | 8 14 38            |
| Right supplementary motor area | 15            | 3.00           | 4 -2 52            |

Activations are displayed at  $P < 0.005$ , uncorrected. Extent threshold  $> 10$  voxels.
